# Supplementary material for: Survival of men with metastatic hormone-sensitive prostate cancer and adrenal-permissive HSD3B1 inheritance
Source: JCI journal article supplement (doi:10.1172/jci183583), 2024-09-16

## Supplemental Figures

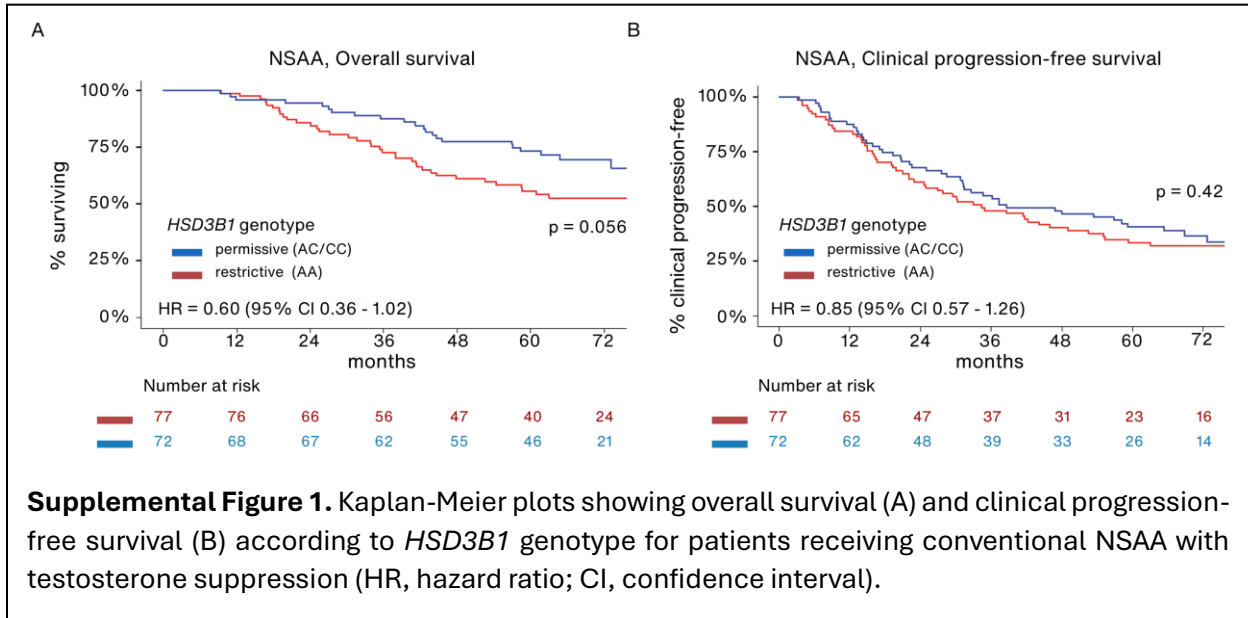

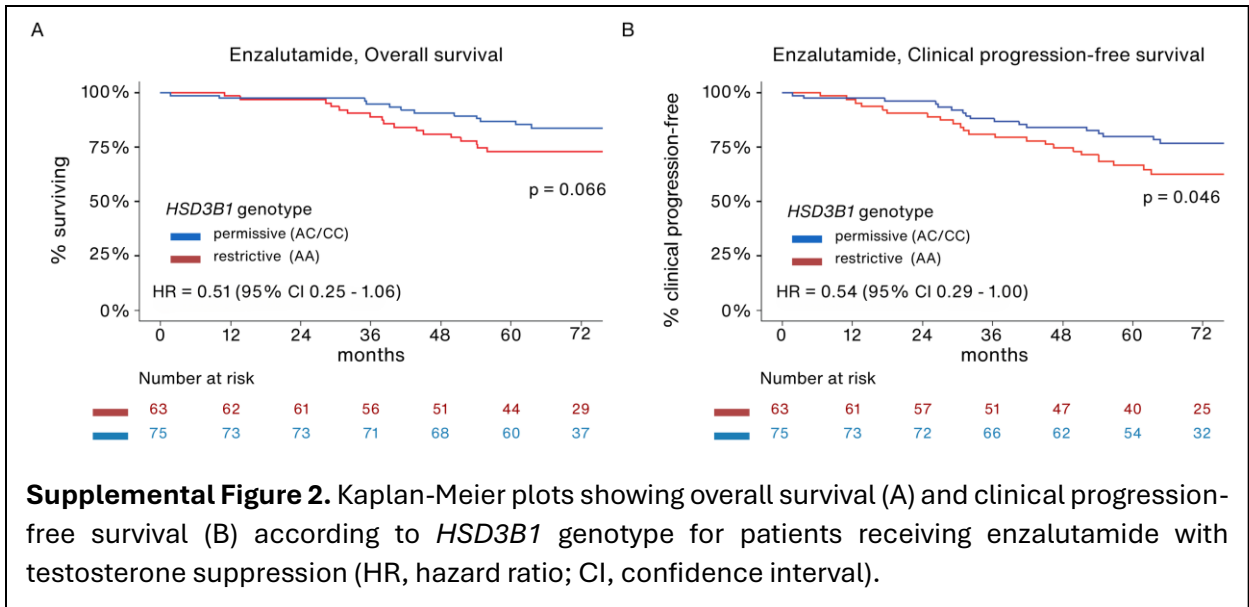

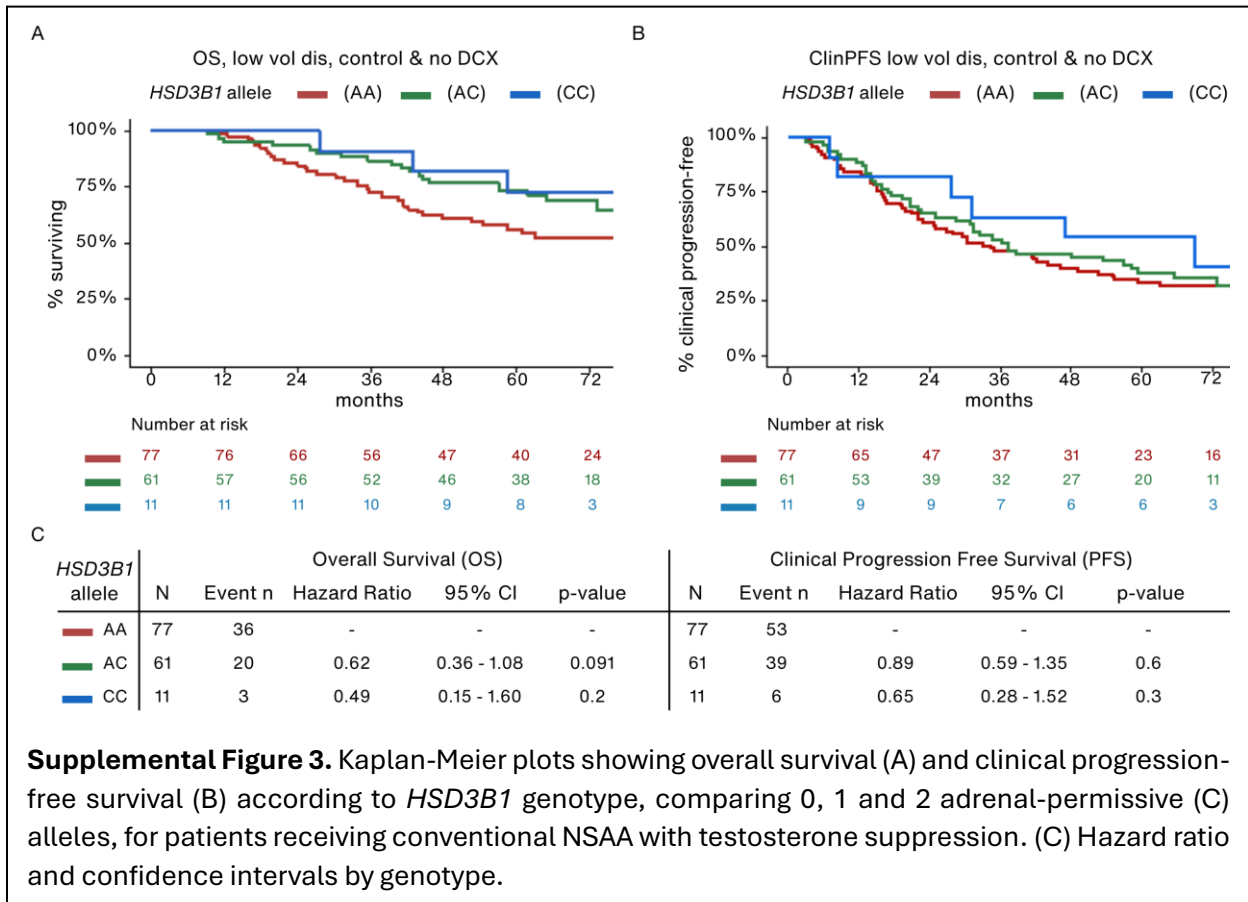

**Supplemental Figure 3.** Kaplan-Meier plots showing overall survival (A) and clinical progression-free survival (B) according to *HSD3B1* genotype, comparing 0, 1 and 2 adrenal-permissive (C) alleles, for patients receiving conventional NSAA with testosterone suppression. (C) Hazard ratio and confidence intervals by genotype.

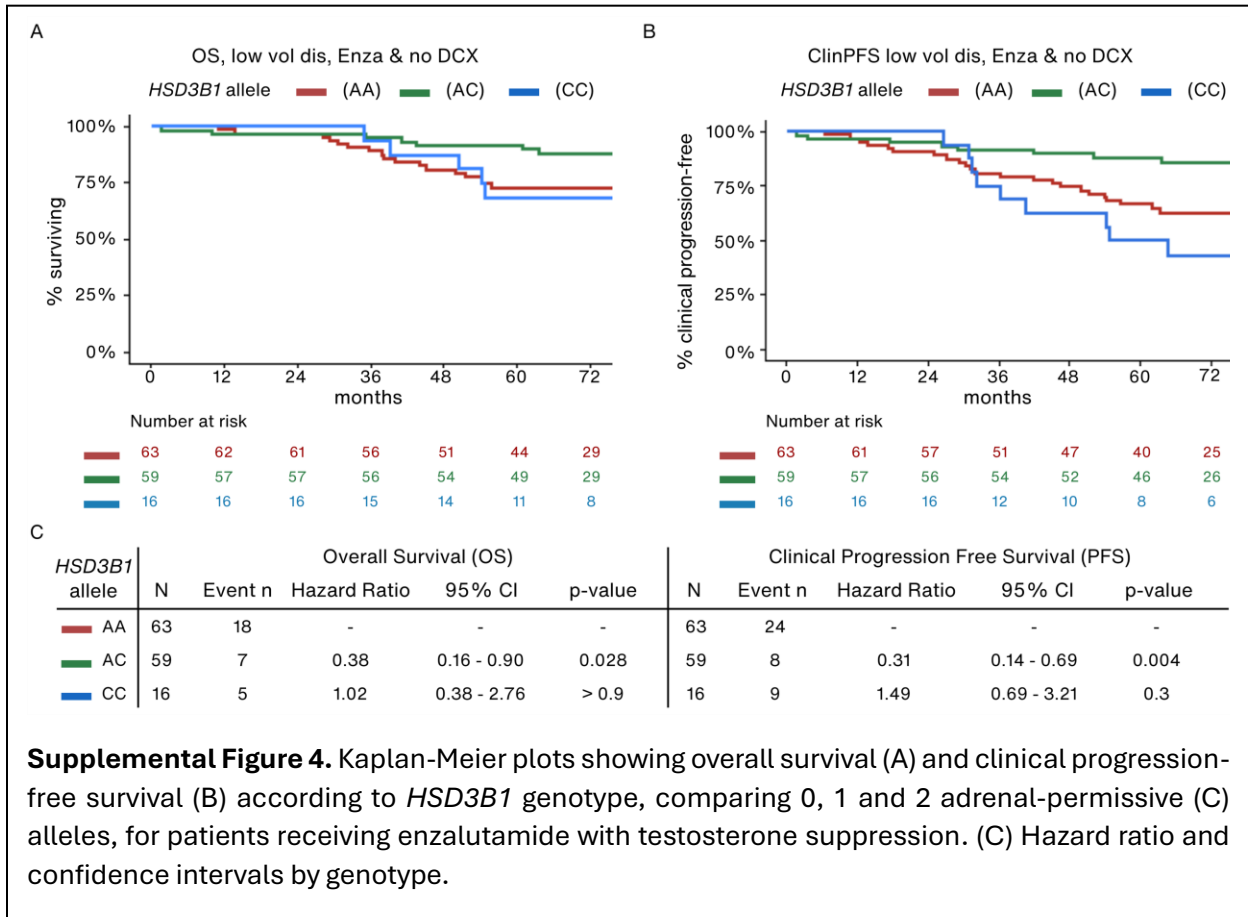

Supplement: sd1 [file 1]
